# Supplementary material
Source: Springer Nature journal article supplement (https://www.springermedizin.de/resource/supplementary/12936_2011_1863_MOESM7_ESM.pdf/9541942)

# Proportion positive (%) on Day 3

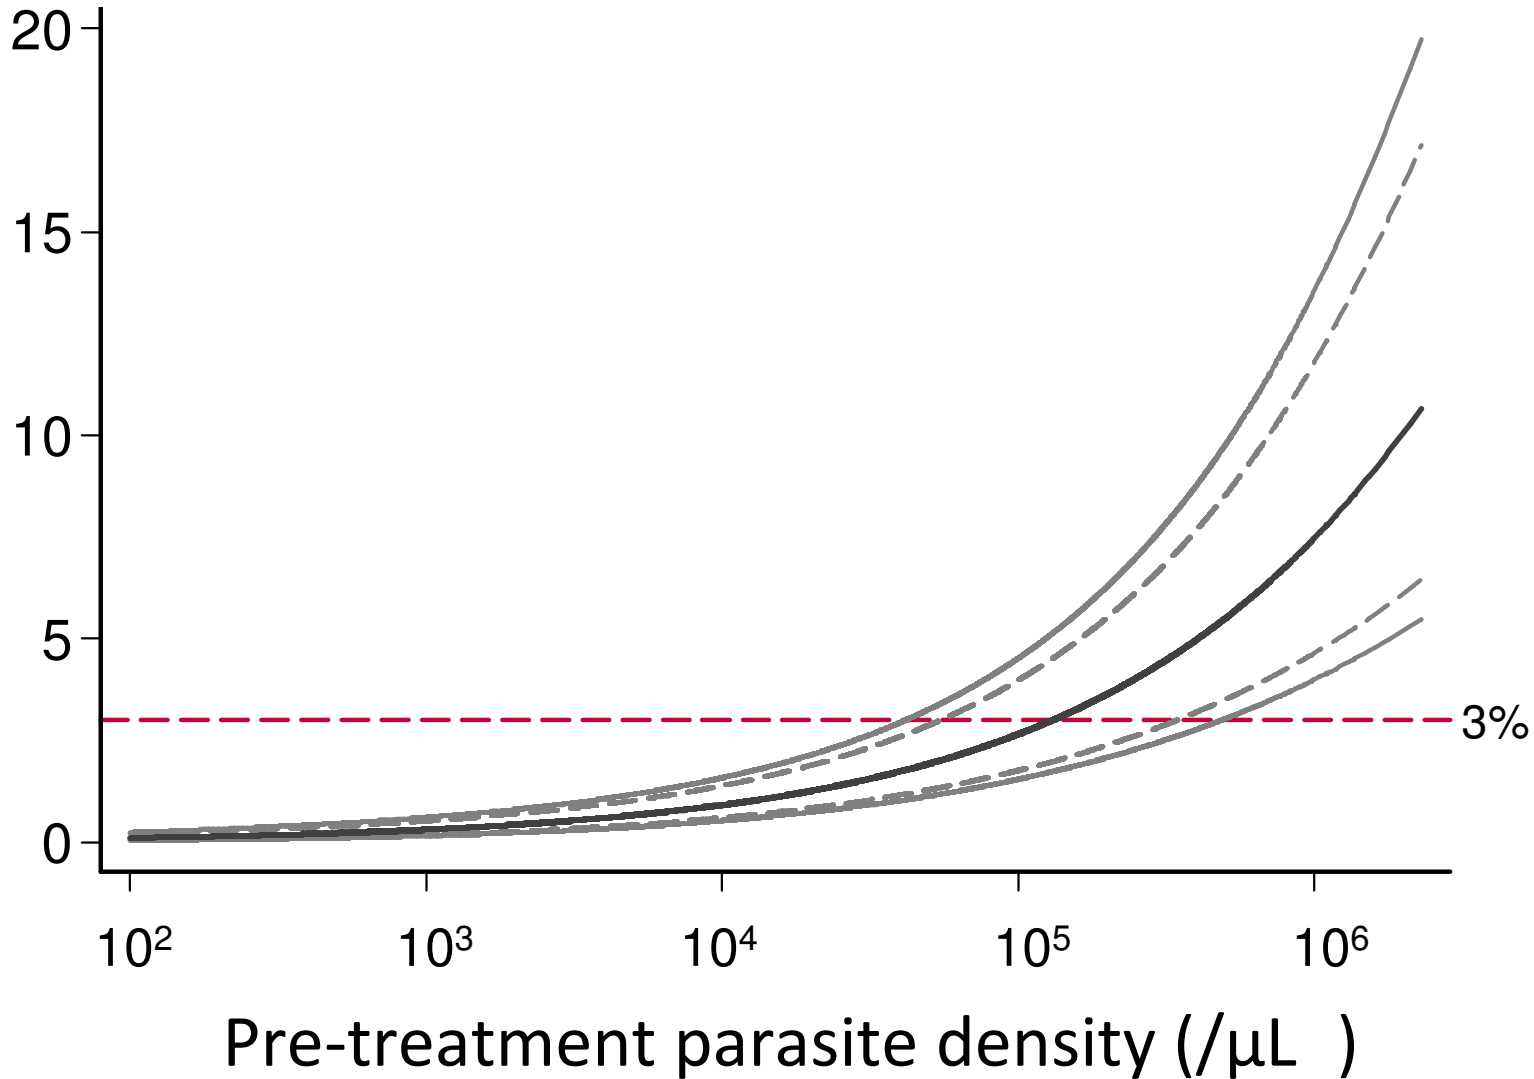

Supplement: MOESM7 [file 9541942]
